1 **Evolutionary History Impacts Phyllosphere Community Assembly on Forage Grasses**

2 Emily K. Bechtold<sup>1</sup> and Klaus Nüsslein<sup>1#</sup>

3

4 <sup>1</sup> Department of Microbiology, University of Massachusetts Amherst, Amherst, MA, USA

5 # Author for correspondence: [nusslein@microbio.umass.edu](mailto:nusslein@microbio.umass.edu), (413) 545-1356

6

7 Running Title: Common symbiotic history drives grass phyllobiome

8 Keywords: plant-microbe relationships, phyllosphere, phyllosymbiosis, microbial  
9 community assembly, grasses

10

11 Conflict of interest: The authors declare that they have no conflict of interest.

12 Funding: The efforts of Emily Bechtold in this work were funded by the Lotta M.  
13 Crabtree Foundation. Additional research support was provided by the  
14 National Science Foundation – Dimensions of Biodiversity (DEB  
15 1442183).

16

17 **ABSTRACT**

18 Benefits leaf bacterial communities provide to plant hosts are reduced by external stress.

19 Understanding how plant hosts impact phyllosphere community assembly, how microbes

20 influence plant traits, and how this interaction changes under stress will advance our insight into

21 the evolutionary relationship between plants and their microbial communities. We investigated

22 phyllosphere community assembly change over time, between host species, and under drought

23 stress on three native temperate grasses and three non-native tropical grasses. By growing them

24 together, effects of host geography and differences in environmental variables were eliminated  
25 allowing us to test evolutionary history on community assembly. We found evidence of  
26 phyllosymbiosis which increased significantly under drought stress, indicating phyllosphere  
27 communities and their response to stress relate to grass species phylogeny. We also show native  
28 temperate grasses displayed stronger cophylogenetic relationships between grass hosts and their  
29 microbial communities and had increased selection by host species over time compared to non-  
30 native tropical hosts. Interestingly, the functional marker gene *nifH*, though differentially present  
31 on all host species was not susceptible to drought. The evidence of shared evolutionary history,  
32 presence of functionally important bacteria, and responses to drought suggest that microbial  
33 communities are important plant traits that coevolve alongside their plant hosts.

34

35

## 36 INTRODUCTION

37 As one of the largest terrestrial habitats, grasslands make up nearly 70% of global agricultural  
38 land and contribute important ecosystem services including impacting water quality, erosion  
39 prevention, and climate regulation through carbon sequestration and greenhouse gas mitigation  
40 [1]. The important agricultural and ecological functions grasslands provide are threatened due to  
41 projected decreases in water availability as drought frequency and severity continue to increase  
42 [2–4]. This will have drastic effects on grassland productivity, ultimately reducing global food  
43 security and increasing climate change [5].

44

45 Grass leaf surfaces harbor diverse microbial communities, termed the phyllosphere, which  
46 provide important functions to their host including disease prevention, stress tolerance,

47 ecosystem productivity, and nutrient cycling through processes such as nitrogen fixation [6–9].  
48 In return, plants provide nutrients to the bacteria creating a symbiotic relationship, but what  
49 drives these relationships is not completely understood. Previous studies show that while plant  
50 host identity plays an important role in microbial community assembly, phyllosphere  
51 communities are broadly dominated by similar taxa including *Proteobacteria*, *Bacteroidetes*, and  
52 *Actinobacteria* [10–13].  
53  
54 Common theories to explain phyllosphere community assembly include the existence of a  
55 functional core community, in which phyllosphere community members provide consistent  
56 functional traits across host species [11, 14], and the hologenome theory of evolution, which  
57 postulates evolution occurs between hosts and microbes together [15]. Many core functions  
58 support epiphytic bacterial growth under harsh conditions indicating microbial adaptation to the  
59 phyllosphere. These include pigmentation and DNA repair systems to protect from UV radiation,  
60 production of extracellular polysaccharides to promote biofilm formation which protects against  
61 osmotic stress, and motility-related proteins for movement towards nutrients [8, 11, 16, 17].  
62 Additional functional traits are important for plant health and ecosystem functioning, by  
63 promoting global carbon and nitrogen cycles, photosynthetic strategies, resource acquisition, and  
64 plant defense [11, 14, 18]. Nitrogen fixation by bacteria called diazotrophs, frequently associated  
65 with the rhizosphere, occurs in the phyllosphere contributing to total nitrogen input in an  
66 ecosystem [9, 11, 19]. The observed differences in relative abundance of functional genes and  
67 taxonomic identity despite low variability between host species [13, 14], suggest the functional  
68 core exists within the hologenome theory. For example, phyllosphere bacteria can have  
69 rhodopsins which provide energy and protection from UV damage. These pigments absorb

70 different wavelengths of light than their plant host allowing for optimal utilization of resources  
71 thus indicating shared evolutionary history [20–22].  
72  
73 How functional profiles and plant-microbe relationships change under stress conditions is still  
74 unknown. Therefore, we do not understand if response to stress is a stochastic process dependent  
75 largely on atmospheric conditions, a response to changes in plant physiology, or a response  
76 characterizing joint plant-microbe interactions. One method to explore host-microbe  
77 relationships is phylosymbiosis, which determines if significant associations between microbial  
78 communities and the phylogeny of their host species exist [23–25]. Phylosymbiosis can be  
79 determined using a Mantel test to compare a host phylogenetic distance matrix to a microbial  
80 community distance matrix. When phylosymbiosis occurs, phylogenetically related host species  
81 have more similar microbial communities than less phylogenetically related hosts.  
82 Phylosymbiosis can result from coevolution, which occurs when plant-microbe systems act as  
83 reciprocal selective forces on each other [25, 26]. However, it can also result from differences in  
84 host geography, host traits, or codiversification, which occurs when hosts and microbes exhibit  
85 parallel divergence during continued associations [27]. A second method used to understand how  
86 host phylogeny relates to microbial communities is cophylogeny, which tests the concordance of  
87 the host phylogeny with the phylogeny of the associated microbial community [28, 29].  
88 Cophylogenetic occurrences indicate shared evolutionary history between hosts and microbial  
89 groups [29, 30]. While cophylogeny can result from processes such as biogeographical distance,  
90 presence of cophylogeny is consistent with host-microbe coevolution [29, 31, 32]. Previous work  
91 suggests that cophylogenetic associations are more likely to exhibit microbe-to-host interactions

92 [14, 33, 34]. Therefore, identifying these associations can help identify evolutionarily important  
93 and ecologically active plant-microbe relationships.

94

95 To understand plant-microbe interactions we need to understand rules of assembly and functional  
96 processes. Our objective was to investigate if phyllosphere communities are an adapted plant  
97 trait. To address this objective, we explored the questions: (i) How does host phylogeny  
98 influence microbial community assembly? (ii) How does host identity or phylogeny influence  
99 microbial community response to drought stress? (iii) How is diazotroph abundance related to  
100 microbial community structure and response to stress? To answer these questions, we  
101 investigated how microbial community assembly changed over time, between host species, and  
102 under drought stress. We chose three species of grasses commonly used in temperate forage  
103 systems and three species commonly used in tropical forage systems. By growing all species in  
104 the same common garden experiment, we eliminated effects of host geography and differences in  
105 environmental variables on community assembly. Additionally, by growing native temperate and  
106 foreign tropical species, we tested the influence of evolutionary history on community assembly.  
107 Comparing the evolutionary history of phyllosphere communities to that of their hosts and  
108 determining how communities change under drought stress, allowed us to understand if  
109 phyllosphere microbes are a plant trait and begin to understand how to leverage microbes to  
110 promote plant growth and stress tolerance.

111

112

113

114

115 MATERIALS AND METHODS

116 *Study system*

117 Seeds for three non-native tropical grasses, *Brachiaria brizantha* (CIAT 26564), *Brachiaria*  
118 *decumbens* (CIAT 6370), and *Brachiaria* hybrid (CIAT 1794), were acquired from CIAT (Cali,  
119 Columbia). Native temperate grass species seeds, *Festuca arundinacea* (endophyte free Tall  
120 Fescue), *Dactylis glomerata* (Orchardgrass), and *Lolium perenne* (Ryegrass), were acquired from  
121 Albert Lea Seed Company (Albert Lea, MN, USA). Seeds were germinated in Pro-mix  
122 commercial potting medium (Quakertown, PA, USA) in 2018 and grown in the College of  
123 Natural Sciences Research and Education Greenhouse at the University of Massachusetts-  
124 Amherst. In June 2019, individual plants were transplanted into 15x30cm pots filled with soil  
125 collected from natural grass fields in Amherst, MA (Supplementary Methods, Supplementary  
126 Table 1). Pots were moved outside, organized in a randomized block design, and allowed to re-  
127 establish. Ten plant replicates of each temperate species were divided between ‘control’ and  
128 ‘drought’ treatments. Drought treatment plants were placed under a 10 ft high rain shelter made  
129 of greenhouse plastic allowing maximal airflow and high UV light penetration (Supplementary  
130 Figure 1). Drought conditions were imposed over 38 days (21 AUG - 27 SEPT 2019). Plants in  
131 the control group were given supplemental water to maintain soil moisture above 80% field  
132 capacity. Plants in the drought group were given supplemental water when necessary to maintain  
133 an even dry-down rate, determined from soil-moisture readings measured twice weekly using a  
134 MiniTrase TDR with Buriable probe (Soilmoisture Equipment Corp., Goleta, CA, USA).

135

136

137

138 *Plant Health Measurements*

139 Plant health measurements were taken on days 1, 19, 26, 33, and 38 to understand the effect of  
140 drought on the plant host. Plant measurements taken were leaf relative water content (RWC),  
141 chlorophyll concentration, and leaf cellular membrane stability determined by measuring  
142 electrolyte leakage [35–37]. At the end of the drought period, above ground biomass was  
143 measured by dividing plant material into five categories: stems, flowers, dead, mature, and  
144 young leaves. After determining fresh mass, samples were dried in an incubator at 70°C for 5  
145 days and dry mass was measured.

146

147 *Bacteria Community Sampling*

148 At each timestep, bacterial community DNA was extracted using the Nucleospin Plant II  
149 Extraction Kit (Machery-Nagel, Düren, Germany) following a modified protocol. Five whole  
150 ryegrass leaves or three whole leaves of each other species were aseptically removed from the  
151 plant host and placed into a 15 ml conical tube with 1.5 ml of NucleoSpin Type-B beads and 4X  
152 volume of Buffer PL1. Tubes were vortexed horizontally for 5 min at room temperature. The  
153 lysate was incubated for 60 min at 65°C, placed in a NucleoSpin Filter tube, and centrifuged for  
154 2 min at 11,000xg. The filtrate was added to 4X Buffer PC and extraction continued following  
155 the manual. Aydogan et al. found that vortexing whole leaf samples in tubes with lysis buffer and  
156 beads extracted important community members from biofilms with minimal plant DNA co-  
157 extraction [12]. Extracted DNA samples underwent a two-step PCR amplification to attach  
158 Illumina adaptor sequences and barcodes (Supplementary Methods). The first PCR step used  
159 chloroplast excluding primers 799F and 1115R targeting the V5-V6 region of the 16S rRNA  
160 gene [10] with linker sequences to attach Access Array Barcodes (Fluidigm, San Francisco, CA,

161 USA) [38]. Amplicons were pooled and sequenced on Illumina MiSeq Platform, with 251 bp  
162 paired-end sequencing chemistry at the Genomics Resource Laboratory (University of  
163 Massachusetts-Amherst). The abundance of nitrogen-fixing bacteria was determined using qPCR  
164 quantifying the *nifH* gene using the PolF and PolR primers [39].

165

### 166 *Sequence Analysis*

167 Using the QIIME2 [40] pipeline, paired-end reads were demultiplexed, merged, trimmed to 315  
168 base pairs, and binned inferring amplicon sequence variants (ASVs). Taxonomic identities were  
169 assigned using the naïve Bayes sklearn classifier trained with the 799F/1115R region of the  
170 Greengenes 13\_8 database.

171 The data contained 9,207 ASVs from 280 samples containing a total of 15,218,029 reads.

172 Samples were rarefied to 4,000 reads, resulting in a loss of 16 samples. Alpha diversity was  
173 calculated using Shannon Diversity Index and beta diversity using Weighted UniFrac and Bray-  
174 Curtis distance metrics.

175

### 176 *Machine learning*

177 We used the mikropml R package to conduct machine learning (ML) analyses [41–43]. For each  
178 model, we used random forest classification with 75% of the test data used to train the model and  
179 the remaining 25% to test the model. ML was used on data collected the last day of drought to  
180 predict if: (1) communities are from control or drought treated plant hosts regardless of host  
181 species, and (2) bacterial communities came from tropical or temperate grass hosts regardless of  
182 treatment. Model performance was evaluated using the area under the operating characteristic  
183 curve (AUC) value. Models yielding AUC values above 0.6 were determined to have good



184 predictive power. Additionally, the mikropml pipeline enables determination of bacterial features  
185 important for prediction and how much they contribute to AUC values.

186

### 187 *Phylosymbiosis and Cophylogeny*

188 Phylosymbiosis was determined using a Mantel test with matrices of grass species' phylogenetic  
189 distances and microbial community beta diversities calculated using Bray-Curtis and weighted  
190 UniFrac distances. Grass host phylogenetic distances were calculated using MEGAX [44].  
191 Sequences of the chloroplast gene for each species were retrieved from NCBI [45] and aligned  
192 using MUSCLE [46]. A phylogenetic tree was constructed using the maximum likelihood  
193 method. A Mantel test was performed with the Spearman's Rank correlation with 9999  
194 permutations using the Vegan package in R [47].

195

196 We tested for cophylogeny to understand if coevolution between microbial communities and  
197 their plant host exists. Two separate global fit methods were employed: ParaFit as carried out in  
198 the ape package [48] and PACo using the R package paco [30]. Microbial data used to test for  
199 cophylogeny were filtered to only include data collected on the last sampling day with at least  
200 100 reads across all samples resulting in 359 ASVs. Both methods were performed with host  
201 phylogeny, microbial 16S rRNA phylogeny, and a presence/absence matrix for each host and  
202 ASV. Additionally, both methods used the Cailleux correction method to account for negative  
203 eigenvalues. PACo analysis was performed with 1000 permutations using the most conservative  
204 quasiswap method, which is used when it is uncertain if the host is tracking symbiont evolution  
205 or symbionts are tracking host evolution. ParaFit was performed using 999 permutations.  
206 Significant associations were plotted using the cophyloplot function in the ape package.

207

208 *Statistical methods*

209 Separate generalized linear mixed models (GLMMs) were created to assess changes in alpha  
210 diversity and *nifH* abundance using gamma distributions with a log link using the lme4 R  
211 package [49]. Drought treatment, host species, and time were fixed effects and sample ID a  
212 random effect to account for sampling over time. Effects of each variable was determined using  
213 Tukey tests for comparison using lsmeans [50]. Effects of host species, drought treatment, time,  
214 and their interactions on microbial community structure were determined using permutational  
215 analysis of variance (PERMANOVA) and analysis of multivariate homogeneity of group  
216 dispersions (PERMDISP2) with weighted UniFrac distances. Results were visualized using non-  
217 metric multidimensional scaling (NMDS). PERMANOVA, PERMDISP2, and NMDS were  
218 conducted using the vegan package and visualized using ggplot2 [51].

219

220

221 RESULTS

222 Phyllosphere communities varied between host species, over time, and as a result of drought.  
223 Across all sample days and host species, *Alphaproteobacteria* was the dominant class in both  
224 control (34.2%) and drought samples (34.6%), but community dynamics over time and as a  
225 result of drought were different between host species (Figure 1A). At the start of the experiment,  
226 *Alphaproteobacteria* and *Gammaproteobacteria* were the dominant groups, but by the end of the  
227 experiment *Cytophagia* was the dominant class under control conditions. While *Cytophagia*  
228 increased in relative abundance under drought conditions, *Alphaproteobacteria* remained the  
229 dominant group on drought stressed hosts.

230

231 *Alphaproteobacteria* was dominated by *Sphingomonas* and *Methylobacterium* for each species,  
232 but trends in relative abundance over time and as a result of drought were different between the  
233 host species (Figure 1B). Genera from the class *Gammaproteobacteria* were more diverse and  
234 variable between treatments, host species, and over time, but *Pseudomonas* was consistently  
235 present across samples (Figure 1C). The increase in *Cytophagia* was accounted for almost  
236 exclusively by the genus *Hymenobacter* (Figure 1D).

237

238 *Host species, time, and drought drive changes in community structure*

239 To evaluate the role plant species and drought had on microbial community diversity, we  
240 modeled how alpha diversity changed over time, as a result of drought, and based on host species  
241 (Supplementary Figure S2). Alpha diversity was not affected by drought treatment but was  
242 significantly different based on host species identity.

243

244 Phyllosphere community structures were impacted by time, host species, and drought.

245 Additionally, the degree microbial communities changed as a result of drought related to known  
246 drought tolerances of their host species. The strongest driver of phyllosphere community  
247 structure was plant host species ( $R^2=0.19$ ,  $p=0.00$ ; PERMANOVA on weighted UniFrac  
248 distances) (Table 1). Sample day ( $R^2=0.14$ ,  $p=0.001$ ) and watering condition ( $R^2=0.02$ ,  $p=0.001$ )  
249 were also significant drivers. All three two-way interactions were significant, with the strongest  
250 interaction between sampling day and host species ( $R^2=0.10$ ,  $p=0.001$ ). However, the three-way  
251 interaction was not significant ( $R^2=0.04$ ,  $p=0.0572$ ). PERMDISP2 was conducted to ensure  
252 significant PERMANOVA results were caused by shifts in community structure instead of

253 differences in dispersion within treatments. PERMDISP2 analyses were not significant ( $p=0.07$ ),  
254 indicating that significant results from the PERMANOVA analyses are important factors for  
255 community structure. Because of significant two-way interactions, we conducted individual  
256 analyses on host species and sampling day to understand how microbial communities from each  
257 host changed over time and were impacted by drought. Overall community response was first  
258 detected 33 days into the experimental period. Additionally, host species effect on community  
259 structure increased over time (Figure 2). Separate PERMANOVAs run on control samples from  
260 Day 1 ( $R^2=0.38$ ,  $p=0.01$ ) and Day 38 ( $R^2=0.57$ ,  $p=0.001$ ) show increased effect of host species  
261 on community assembly under non-stressed conditions. Additionally, influence of host species  
262 within the temperate ( $R^2=0.34$ ,  $p=0.039$ ) and tropical ( $R^2=0.31$ ,  $p=0.094$ ) groups was similar at  
263 the start of the experiment, but temperate species ( $R^2=0.72$ ,  $p=0.001$ ) explained greater  
264 variability by the end of the experiment than the tropical species ( $R^2=0.39$ ,  $p=0.024$ ) (Table 2).

265 To further understand changes in community structure, average community distance over time  
266 was modelled. On temperate grasses, average distance significantly decreased over time in both  
267 control and drought treatments ( $p_{\text{adj}} < 0.001$ , TukeyHSD posthoc analyses). However,  
268 community distance on tropical grasses remained stable over time. Additionally, significant  
269 differences were not observed between temperate and tropical control groups but were observed  
270 between drought samples ( $p_{\text{adj}}=0.04$ ) (Figure 3).

271 We analyzed individual host species to understand how susceptible to drought each bacterial  
272 community was based on host species. Ryegrass microbial communities were the first to show  
273 changes between control and drought treatments; significant differences were first observed on  
274 day 26 ( $R^2=0.37$ ,  $P=0.012$ ) (Supplementary Figure S3). *B. brizantha* ( $R^2=0.47$ ,  $P=0.031$ ), Tall  
275 Fescue ( $R^2=0.27$ ,  $P=0.035$ ), and Orchardgrass ( $R^2=0.25$ ,  $P=0.033$ ) first showed significant

276 differences on day 33; *Brachiaria* hybrid ( $R^2 = 0.30$ ,  $P = 0.006$ ) on day 38; and *B. decumbens*  
277 never displayed significant differences.

### 278 *Machine Learning Allows Accurate Prediction of Microbial Communities in Drought*

279 Machine learning (ML) allows detection of trends missed by traditional methods such as  
280 PERMANOVA [43], and allows identification of features that enable its predicative power. We  
281 used ML to test for a common response to drought among host species despite plant host  
282 selection on microbial communities. ML revealed high predictive power in determining if  
283 microbial communities were from the control or drought treatment (AUC=0.87) (Supplementary  
284 Figure S4) and that the top eight ASVs contributed 0.07 to our AUC value (Figure 4,  
285 Supplementary Table S2).

286

287 Additionally, ML had high predictive power in determining if communities were from temperate  
288 or tropical hosts (AUC=0.89) at the end of the experiment regardless of drought treatment. The  
289 model identified that 2 features, *Sphingomonas mali* and *Methylobacterium organophilum*,  
290 contributed 0.107 to our AUC values, indicating their presence was important in model  
291 performance (Supplementary Figure S5). Since tropical grasses are more related to each other  
292 than to the temperate grasses, this analysis helped determine if community assembly is stochastic  
293 or deterministic and identifies features associated with the two grass types.

294

### 295 *Grass Host Phylogeny Influences Phyllosphere Communities*

296 Host species impact on community assembly and response to drought was tested using  
297 phyllosymbiosis, which occurs when significant association between host species phylogeny and  
298 associated microbial communities occur [23]. Mantel tests on Bray-Curtis dissimilarities showed

299 more closely related host species had more similar microbial communities (Mantel  $r=0.117$ ,  
300  $p=0.0001$ ). Additionally, microbial communities were more related to host phylogeny during  
301 drought stress (Mantel  $r=0.202$ ,  $p=0.007$ ) than under control conditions (Mantel  $r=0.158$ ,  $p=0.02$ )  
302 at the end of the drought period. Tests of phyllosymbiosis using Weighted UniFrac measures  
303 showed similar trends but with weaker associations (All: Mantel  $r=0.064$ ,  $p=0.0002$ ; Drought:  
304 Mantel  $r=0.114$ ,  $p=0.05$ ; Control: Mantel  $r=0.057$ ,  $p=0.19$ ). Because weighted UniFrac  
305 incorporates phylogenetic information, it reduces nuanced variations at the tips of the bacterial  
306 phylogenetic trees [25].

307

308 To further explore evolutionary relationships between host phylogeny and bacterial  
309 communities, cophylogeny was tested with two separate global-fit methods. Global-fit methods  
310 test congruence between host phylogenetic trees and the corresponding microbial phylogeny and  
311 allow for identification of significant associations. PACo (Procrustes Approach to Cophylogeny)  
312 uses Procrustes analyses to test the dependency of one phylogeny on the other [29, 30]. ParaFit  
313 compares two distance matrices constructed from host and microbial phylogenetic distances and  
314 tests for random associations between the groups [52]. Positive correlations can indicate host-  
315 microbe coevolution [32, 53]. Tests for cophylogeny conducted on all samples collected on day  
316 38 regardless of treatment using ParaFit (ParaFitGlobal=1.6024,  $p=0.001$ , permutations=999),  
317 and PACo (PACo=0.999,  $p=0.003$ ) revealed significant global-fit cophylogenetic relationships.

318

319 The influence of drought stress on cophylogenetic signal was determined to understand if  
320 microbial response to drought was a stochastic process, and to look for evidence of a joint plant-  
321 microbial response. Results using Parafit from both control (ParaFitGlobal=1.136,  $p=0.001$ ) and

322 drought (ParaFitGlobal=1.296,  $p=0.001$ ) showed evidence of cophylogeny. In the control  
323 treatment there were 414 significant associations between bacteria and plant hosts and 340  
324 significant associations in drought treatment samples. Tanglegrams displaying significant  
325 associations between host and microbe phylogenies were created for control and drought  
326 treatments (Figure 5). Evidence of cophylogeny at the end of the experimental period was  
327 additionally detected using PACo for control (PACo=0.998,  $p=0.001$ ) and drought  
328 (PACo=0.999,  $p=0.002$ ) treatments.

329

330

### 331 *nifH* gene abundance varies over time and by host species

332 No significant trend in *nifH* gene abundance was observed as a result of drought treatment, but  
333 significant differences in abundance were observed between host species and over time (Figure  
334 6). The temperate grasses displayed a decrease in abundance over time to varying degrees, but  
335 the tropical grasses did not. Ryegrass control samples were temporally stable, but drought  
336 samples significantly decreased between day 1 and day 38 ( $p_{\text{adj}}=0.004$ ). Tall Fescue  
337 ( $p_{\text{adj}}=0.02$ ) and Orchardgrass ( $p_{\text{adj}}=0.006$ ) significantly decreased between sample day 1 and  
338 38 regardless of treatment. Control samples of *B. brizantha* showed no significant changes over  
339 time, but *nifH* copy number significantly increased over time in drought samples ( $p_{\text{adj}}=0.001$ ).  
340 *Brachiaria* hyb. showed no differences as a result of drought but significantly varied across days  
341 (Day1 compared to 26 ( $p_{\text{adj}}=0.001$ ) and day 33 ( $p_{\text{adj}}=0.03$ )). *B. decumbens* significantly  
342 increased over time in both control and drought conditions ( $p_{\text{adj}}>0.001$ ). The trends over time  
343 for *nifH* abundance closely matched the trends observed in average UniFrac distance over time  
344 for each host species (Supplementary Figure S6).

345 DISCUSSION

346 Evolutionary history impacts grass phyllosphere communities and their response to drought.  
347 Consistent with previous studies across multiple plant species, we found that host species was  
348 the most important factor influencing community assembly and that *Alphaproteobacteria*  
349 dominated communities [10, 13, 54, 55]. Additionally, our study revealed that communities  
350 changed over time and as a result of drought. We observed strong temporal patterns in which  
351 *Gammaproteobacteria* were replaced over time by *Cytophagia*, similar to studies in switchgrass  
352 that found *Gammaproteobacteria* were replaced throughout the growing season by  
353 *Alphaproteobacteria* [56]. While temporal replacement occurred on each host species, degree of  
354 replacement varied widely and between treatments. By the end of the experimental period,  
355 *Cytophagia* was the dominant class on control plants while *Alphaproteobacteria* dominated  
356 drought plants. The persistent presence of *Alphaproteobacteria*, in particular *Sphingomonas* and  
357 *Methylobacterium*, throughout the experiment on control and drought stressed plants likely  
358 resulted from niche partitioning and their complementary metabolisms uniquely suited to the  
359 phyllosphere [11, 56]. In the phyllosphere, *Sphingomonas* survive on a wide range of substrates  
360 due to high abundance of TonB receptors, while *Methylobacterium* can grow on one-carbon  
361 compounds such as methanol, a byproduct of host cell-wall metabolism [11, 57]. Additionally,  
362 their flexible metabolisms allow for adaptation to changing nutrient availability as leaf  
363 conditions change. Not only are they able to survive the harsh phyllosphere environment, they  
364 can promote plant growth and stress tolerance. Inoculation of *Sphingomonas* onto soybean plants  
365 resulted in increased tolerance of drought conditions and *Methylobacterium* on leaf surfaces are  
366 able to fix nitrogen and increase plant biomass production [58, 59]. The observed persistence  
367 under stress conditions in combination with their functional benefits, could indicate



368 coevolutionary adaptation to life in the phyllosphere. Furthermore, *Sphingomonas* and  
369 *Methylobacterium* should be explored as biofertilizers because of their widespread presence and  
370 observed drought tolerance.

371

372 Host species effect on community assembly increased over time. On day one of the experiment,  
373 host species accounted for 38% of community variability in the control samples compared to  
374 57% on the last day. This likely results from host selection on community assembly; host species  
375 selection increases over time as communities successfully establish, as more bacteria land on the  
376 leaf surface through dispersal, and as communities change in relation to plant development [56,  
377 60, 61]. Interestingly, the effect of host species overtime was different between the native  
378 temperate grasses and the non-native tropical grasses. On the first day of the experiment, host  
379 species exhibited similar influence on microbial communities from temperate and tropical  
380 grasses. However, by the end of the experimental period, species explained 72% of the  
381 variability on temperate grass hosts but only 39% on tropical grass hosts. The difference in effect  
382 over time between the tropical and temperate grasses likely results from host-microbe  
383 evolutionary relationships that exist for the native temperate species but not for the non-native  
384 tropical species.

385

386 To understand if phyllosphere communities from temperate grasses experienced increased  
387 selection compared to tropical grasses, we determined how ecological distance changed over  
388 time for each host species. Since temperate grasses were grown in their native environment, we  
389 expected increased host selection compared to tropical grasses. While change over time  
390 accounted for similar amounts of variability in the tropical (27%) and temperate grasses (23%),

391 the average distance of communities found on each host species decreased in temperate grasses  
392 but remained stable in tropical grasses. These significant differences suggest deterministic  
393 assembly in the phyllosphere. In the temperate grasses, decreased distance could result from  
394 increased selection caused by coevolved plant-microbe relationships. However, since tropical  
395 grasses were not grown in an environment with their native microbiota, changes over time and  
396 between species were more likely a result of host physiology.

397

398 Presence of phylosymbiosis under non-stressed conditions indicates host-species influences  
399 community assembly and that bacterial communities are more similar to each other on plant  
400 hosts that are more phylogenetically similar [62]. While phylosymbiosis could result from  
401 coevolution or cospeciation, it can also result from differences in host ecological niche,  
402 geographic locations, or host filtering in which related hosts have many shared traits [23, 63, 64].  
403 Therefore, phylosymbiosis does not determine a specific mechanism. Presence of  
404 phylosymbiosis demonstrates that phyllosphere community assembly is a deterministic process  
405 but what is driving it is still not fully understood. By growing plants in the same environment,  
406 we eliminated some of the confounding factors that might otherwise contribute to this  
407 relationship such as differences in soil, weather patterns, or biogeographic separation. Previous  
408 work across animal species concluded that when related hosts grown under identical conditions  
409 maintain distinct microbial communities, it is analogous to microbial markers of host  
410 evolutionary relationships [26].

411

412 Unsurprisingly, the cophylogenetic analysis revealed strong evidence of cophylogeny in the  
413 temperate grass species with hundreds of significant correlations compared to only dozens

414 observed in the tropical grasses. Thus, cophylogenetic signal was stronger in the native  
415 temperate grasses than in non-native tropical grasses. The differences between tropical and  
416 temperate hosts further supports the idea that the host-species effect seen in the temperate grasses  
417 is a result of coevolution as microbial members have adapted alongside their host.

418

### 419 **Microbial Community Response: An Adaptation to Drought**

420 Understanding how phyllosphere communities respond to drought in relation to their plant host  
421 is important for understanding how we can use bacteria as biofertilizers to promote plant health  
422 in the future. Interestingly, no difference in alpha diversity as a result of drought was observed  
423 even though drought caused changes in bacterial community structures. Previous work found  
424 that phyllosphere community diversity but not composition was related to plant community  
425 productivity [6]. Therefore, shifts we are seeing in community structure but not in alpha diversity  
426 could indicate microbial communities act as a stress response trait.

427

428 The forage grass species used in this experiment have varying degrees of drought tolerance  
429 resulting from the different strategies used under drought stress. Drought tolerance is well  
430 documented for the temperate grasses used in this study. Ryegrass is the most drought  
431 susceptible and under field conditions tall fescue is the most drought tolerant [65, 66]. However,  
432 when grown in pots, orchardgrass exhibits higher drought tolerance due to its abilities to take up  
433 water in low soil moisture conditions, promote membrane stabilization, and protect its meristem  
434 from dehydration [66, 67]. In the field, tall fescue has higher drought tolerance due to its ability  
435 to form deep root networks, which were limited by the depth of pots in which they were grown.  
436 The C4 tropical plants have greater water use efficiency due to their ability to maintain higher

437 photosynthetic rates under decreased water stress compared to the C3 temperate species [68, 69].  
438 Additionally, they can form extensive root networks that enable high water uptake efficiency  
439 from soil [70]. These levels of known drought tolerance correlate with the changes we saw in  
440 microbial community structures. Ryegrass, the most drought susceptible, was the first to show  
441 signs of change, followed by orchardgrass and tall fescue. The more drought tolerant tropical  
442 grasses showed changes in microbial communities later than the temperate grasses. Even though  
443 previous studies found *B. brizantha* and *B. decumbens* to have similar drought tolerances, we  
444 observed changes in *B. brizantha* communities on day 33 but no significant changes as a result of  
445 drought in *B. decumbens* [70, 71]. What remains unclear is, if changes in microbial community  
446 structure are in direct response to drought or in response to changes in host physiology.

447

448 If changes in communities were in direct response to drought, we may expect to see a decrease in  
449 phylosymbiosis as selection imposed by host species decreased and communities became more  
450 similar to each other. Instead, we observed an increase in phylosymbiosis under drought stress  
451 indicating that selection on microbial communities is increasing. Conversely, total  
452 cophylogenetic associations decreased as a result of drought with less overall connections  
453 between host and microbe phylogenies. However, not all host species showed similar trends,  
454 indicating that microbial community response to drought, much like community assembly, is a  
455 deterministic process facilitated by changes in plant host physiology. Because strong evidence of  
456 phylosymbiosis and cophylogeny remain in spite of shifts in community structure, we propose  
457 that phyllosphere communities are a plant stress response trait that has coevolved alongside its  
458 plant host.

459

460 Despite the strong host species effect on microbial communities during drought, we used  
461 machine learning to determine if there was a common response to drought across our host  
462 species. Determining if any microbes invariably survive under drought conditions across our  
463 range of hosts and have the potential to promote plant growth is important for determining  
464 prospective bacteria to test as biofertilizers. Our ML pipeline accurately predicted if a sample  
465 came from a drought stressed or control plant 87% of the time, confirming that there is a  
466 common response to drought despite divergent communities. No single bacterial ASV was  
467 responsible for model prediction, rather several ASVs provided minor predictive power. Of the  
468 top 8 predictors, 5 from the order Actinomycetales were slightly elevated in drought samples  
469 including *Microbacterium*. In the rhizosphere, *Microbacterium* can produce volatile compounds  
470 that promote plant health and growth [72] and help regulate plant response to drought stress by  
471 altering the metabolite profile to promote osmoregulation [73]. Thus, even though microbial  
472 communities are host specific, core functions exist in phyllosphere communities across plant  
473 hosts that enable microbial survival under harsh conditions while also offering functional support  
474 to their plant host.

475

#### 476 **Nitrogen Fixation: A Core Function**

477 We used nitrogen fixation as one example of an important function microbes provide plants.  
478 Recent studies found phyllosphere communities input nitrogen into their ecosystems [9, 59, 74].  
479 When we assessed our communities for nitrogen fixation potential, we found stable diazotroph  
480 presence on every host species. However, *nifH* abundance was not negatively impacted by  
481 drought. The occurrence of temporally stable diazotrophs on every host species indicates its

482 likely an important part of the functional core community, while the differential abundance  
483 between host species points to the evolutionary relationships between plants and their microbes.

484

485 When under drought stress, the most drought tolerant host species, *B. decumbens*, exhibited  
486 increased *nifH* abundance and a strong cophylogenetic relationship with the bacterial family  
487 Oxalobacteraceae accounting for 14 of the 47 significant relationships. Additionally, relative  
488 abundance of Oxalobacteraceae from the class Betaproteobacteria increased on *B. decumbens*  
489 under drought. Oxalobacteraceae are adapted to oligotrophic conditions and some genera are  
490 nitrogen-fixers (Supplementary Figure S7) [75]. Because of the sustained presence of *nifH* across  
491 time and treatments in combination with their correlation to community structure, we propose  
492 nitrogen-fixation as a keystone function of phyllosphere communities. This further supports our  
493 hypothesis that microbial communities are a plant trait which help promote plant stress tolerance.

494

## 495 **Conclusion**

496 This study revealed phyllosphere community assembly is related to host evolutionary history.  
497 The strong evidence of phyllosymbiosis in combination with increased selection and cophylogeny  
498 in the native temperate grasses compared to the non-native tropical grasses, suggests that  
499 microbial communities are a plant trait that coevolve alongside their plant hosts. The conserved  
500 presence but differential abundance of important bacteria such as *Sphingomonas* and  
501 *Methylobacterium*, and the functional potential of nitrogen fixation during drought stress further  
502 support the idea that microbial communities are plant traits that evolve to promote plant growth  
503 and stress tolerance. Future studies should look at the effect of inoculating plants with the  
504 taxonomically and functionally important bacteria identified in this study that were also

505 temporally and drought stable. Creating biofertilizers with ecologically important and  
506 evolutionarily selected microbes could promote plant health and tolerance to a changing climate.

507

508

#### 509 ACKNOWLEDGMENTS

510 We would like to thank Michelle DaCosta and Jefferson Lu for guidance and equipment for  
511 measuring plant health. Genomics service and sequencing was performed by Ravi Ranjan at the  
512 Genomics Resource Laboratory, University of Massachusetts Amherst, MA. We are thankful for  
513 financial support from the Lotta M. Crabtree Foundation, and the National Science Foundation –  
514 Dimensions of Biodiversity (DEB 1442183).

515

516

#### 517 COMPLIANCE WITH ETHICAL STANDARDS

518 Conflict of interest.

519 The authors declare that they have no conflict of interest.

520

521

#### 522 SUPPLEMENTARY INFORMATION

523 Supplementary information is available online only.

524 Single PDF file, 5.1 Mb of Supplementary information containing table of contents, methods,  
525 tables, figures, and references.

526

527 REFERENCES

528

- 529 1. Bengtsson J, Bullock JM, Egoh B, Everson C, Everson T, O'Connor T, et al. Grasslands—  
530 more important for ecosystem services than you might think. *Ecosphere* 2019; **10**: e02582.
- 531 2. Ciais Ph, Reichstein M, Viovy N, Granier A, Ogée J, Allard V, et al. Europe-wide reduction in  
532 primary productivity caused by the heat and drought in 2003. *Nature* 2005; **437**: 529–533.
- 533 3. Steiger NJ, Smerdon JE, Cook BI, Seager R, Williams AP, Cook ER. Oceanic and radiative  
534 forcing of medieval megadroughts in the American Southwest. *Science Advances* 2019; **5**:  
535 eaax0087.
- 536 4. Wolfe DW, DeGaetano AT, Peck GM, Carey M, Ziska LH, Lea-Cox J, et al. Unique challenges  
537 and opportunities for northeastern US crop production in a changing climate. *Climatic  
538 Change* 2018; **146**: 231–245.
- 539 5. Smith MD. The ecological role of climate extremes: current understanding and future  
540 prospects. *Journal of Ecology* 2011; **99**: 651–655.
- 541 6. Laforest-Lapointe I, Paquette A, Messier C, Kembel SW. Leaf bacterial diversity mediates  
542 plant diversity and ecosystem function relationships. *Nature* 2017; **546**: 145–147.
- 543 7. Saleem M, Meckes N, Pervaiz ZH, Traw MB. Microbial Interactions in the Phyllosphere  
544 Increase Plant Performance under Herbivore Biotic Stress. *Front Microbiol* 2017; **8**.
- 545 8. Rastogi G, Coaker GL, Leveau JHJ. New insights into the structure and function of  
546 phyllosphere microbiota through high-throughput molecular approaches. *FEMS  
547 Microbiology Letters* 2013; **348**: 1–10.



- 548 9. Fűrnkranz M, Wanek W, Richter A, Abell G, Rasche F, Sessitsch A. Nitrogen fixation by  
549 phyllosphere bacteria associated with higher plants and their colonizing epiphytes of a  
550 tropical lowland rainforest of Costa Rica. *ISME J* 2008; **2**: 561–570.
- 551 10. Redford AJ, Bowers RM, Knight R, Linhart Y, Fierer N. The ecology of the phyllosphere:  
552 geographic and phylogenetic variability in the distribution of bacteria on tree leaves.  
553 *Environ Microbiol* 2010; **12**: 2885–2893.
- 554 11. Delmotte N, Knief C, Chaffron S, Innerebner G, Roschitzki B, Schlapbach R, et al.  
555 Community proteogenomics reveals insights into the physiology of phyllosphere bacteria.  
556 *Proceedings of the National Academy of Sciences* 2009; **106**: 16428–16433.
- 557 12. Aydogan EL, Moser G, Müller C, Kämpfer P, Glaeser SP. Long-Term Warming Shifts the  
558 Composition of Bacterial Communities in the Phyllosphere of *Galium album* in a  
559 Permanent Grassland Field-Experiment. *Front Microbiol* 2018; **9**.
- 560 13. Kembel SW, O'Connor TK, Arnold HK, Hubbell SP, Wright SJ, Green JL. Relationships  
561 between phyllosphere bacterial communities and plant functional traits in a neotropical  
562 forest. *PNAS* 2014; **111**: 13715–13720.
- 563 14. Lajoie G, Maglione R, Kembel SW. Adaptive matching between phyllosphere bacteria and  
564 their tree hosts in a neotropical forest. *Microbiome* 2020; **8**: 70.
- 565 15. Rosenberg E, Zilber-Rosenberg I. The hologenome concept of evolution after 10 years.  
566 *Microbiome* 2018; **6**: 78.
- 567 16. Lindow SE, Brandl MT. Microbiology of the Phyllosphere. *Appl Environ Microbiol* 2003; **69**:  
568 1875–1883.

- 569 17. Lindow SE, Leveau JHJ. Phyllosphere microbiology. *Current Opinion in Biotechnology* 2002;  
570 **13**: 238–243.
- 571 18. Rosado BHP, Almeida LC, Alves LF, Lambais MR, Oliveira RS. The importance of  
572 phyllosphere on plant functional ecology: a phyllo trait manifesto. *New Phytologist* 2018;  
573 **219**: 1145–1149.
- 574 19. Li Y, Sun H, Wu Z, Li H, Sun Q. Urban traffic changes the biodiversity, abundance, and  
575 activity of phyllospheric nitrogen-fixing bacteria. *Environ Sci Pollut Res* 2019; **26**: 16097–  
576 16104.
- 577 20. Atamna-Ismaeel N, Finkel O, Glaser F, Mering C von, Vorholt JA, Koblížek M, et al. Bacterial  
578 anoxygenic photosynthesis on plant leaf surfaces. *Environmental Microbiology Reports*  
579 2012; **4**: 209–216.
- 580 21. Carvalho SD, Castillo JA. Influence of Light on Plant–Phyllosphere Interaction. *Front Plant*  
581 *Sci* 2018; **9**.
- 582 22. Vandenkoornhuysen P, Quaiser A, Duhamel M, Van AL, Dufresne A. The importance of the  
583 microbiome of the plant holobiont. *New Phytologist* 2015; **206**: 1196–1206.
- 584 23. Lim SJ, Bordenstein SR. An introduction to phylosymbiosis. *Proc R Soc B* 2020; **287**:  
585 20192900.
- 586 24. Brucker RM, Bordenstein SR. The Hologenomic Basis of Speciation: Gut Bacteria Cause  
587 Hybrid Lethality in the Genus *Nasonia*. *Science* 2013; **341**: 667–669.
- 588 25. Pollock FJ, McMinds R, Smith S, Bourne DG, Willis BL, Medina M, et al. Coral-associated  
589 bacteria demonstrate phylosymbiosis and cophylogeny. *Nat Commun* 2018; **9**: 4921.

- 590 26. Brooks AW, Kohl KD, Brucker RM, Opstal EJ van, Bordenstein SR. Phyllosymbiosis:  
591 Relationships and Functional Effects of Microbial Communities across Host Evolutionary  
592 History. *PLOS Biology* 2016; **14**: e2000225.
- 593 27. Moran NA, Sloan DB. The Hologenome Concept: Helpful or Hollow? *PLOS Biology* 2015; **13**:  
594 e1002311.
- 595 28. Page RDM. Tangled Trees: Phylogeny, Cospeciation, and Coevolution. 2003. University of  
596 Chicago Press.
- 597 29. Hutchinson MC, Cagua EF, Balbuena JA, Stouffer DB, Poisot T. paco: implementing  
598 Procrustean Approach to Cophylogeny in R. *Methods in Ecology and Evolution* 2017; **8**:  
599 932–940.
- 600 30. Balbuena JA, Míguez-Lozano R, Blasco-Costa I. PACo: A Novel Procrustes Application to  
601 Cophylogenetic Analysis. *PLOS ONE* 2013; **8**: e61048.
- 602 31. Weckstein JD. Biogeography Explains Cophylogenetic Patterns in Toucan Chewing Lice.  
603 *Systematic Biology* 2004; **53**: 154–164.
- 604 32. Youngblut ND, Reischer GH, Walters W, Schuster N, Walzer C, Stalder G, et al. Host diet  
605 and evolutionary history explain different aspects of gut microbiome diversity among  
606 vertebrate clades. *Nat Commun* 2019; **10**.
- 607 33. Innerebner G, Knief C, Vorholt JA. Protection of *Arabidopsis thaliana* against Leaf-  
608 Pathogenic *Pseudomonas syringae* by *Sphingomonas* Strains in a Controlled Model  
609 System. *Appl Environ Microbiol* 2011; **77**: 3202–3210.
- 610 34. Noble AS, Noe S, Clearwater MJ, Lee CK. A core phyllosphere microbiome exists across  
611 distant populations of a tree species indigenous to New Zealand. *PLoS One* 2020; **15**.

- 612 35. Barrs HD, Weatherley PE. A Re-Examination of the Relative Turgidity Technique for  
613 Estimating Water Deficits in Leaves. *Aust Jnl Of Bio Sci* 1962; **15**: 413–428.
- 614 36. Hoffman L, DaCosta M, Ebdon JS, Watkins E. Physiological Changes during Cold  
615 Acclimation of Perennial Ryegrass Accessions Differing in Freeze Tolerance. *Crop Science*  
616 2010; **50**: 1037–1047.
- 617 37. Lutts S, Kinet JM, Bouharmont J. NaCl-induced Senescence in Leaves of Rice (*Oryza sativa*  
618 L.) Cultivars Differing in Salinity Resistance. *Annals of Botany* 1996; **78**: 389–398.
- 619 38. Naqib A, Poggi S, Wang W, Hyde M, Kunstman K, Green SJ. Making and Sequencing Heavily  
620 Multiplexed, High-Throughput 16S Ribosomal RNA Gene Amplicon Libraries Using a  
621 Flexible, Two-Stage PCR Protocol. *Methods Mol Biol* 2018; **1783**: 149–169.
- 622 39. Poly F, Monrozier LJ, Bally R. Improvement in the RFLP procedure for studying the diversity  
623 of *nifH* genes in communities of nitrogen fixers in soil. *Research in Microbiology* 2001; **152**:  
624 95–103.
- 625 40. Bolyen E, Rideout JR, Dillon MR, Bokulich NA, Abnet CC, Al-Ghalith GA, et al. Reproducible,  
626 interactive, scalable and extensible microbiome data science using QIIME 2. *Nature*  
627 *Biotechnology* 2019; **37**: 852–857.
- 628 41. Topçuoğlu BD, Lapp Z, Kelly Sovacool, Evan Snitkin, Jenna Wiens, Patrick D. Schloss.  
629 mikRopML: User-Friendly R Package for Robust Machine Learning Pipelines. *Journal of*  
630 *Open Source Software* 2021; **6**: 3073.
- 631 42. R Core Team. R: a language and environment for statistical computing. [https://www.R-](https://www.R-project.org/)  
632 [project.org/](https://www.R-project.org/). Accessed 31 Mar 2020.

- 633 43. Topçuoğ BD. A Framework for Effective Application of Machine Learning to Microbiome-  
634 Based Classification Problems. 2020; **11**: 13.
- 635 44. Stecher G, Tamura K, Kumar S. Molecular Evolutionary Genetics Analysis (MEGA) for  
636 macOS. *Molecular Biology and Evolution* 2020; **37**: 1237–1239.
- 637 45. Schoch CL, Ciufu S, Domrachev M, Hotton CL, Kannan S, Khovanskaya R, et al. NCBI  
638 Taxonomy: a comprehensive update on curation, resources and tools. *Database (Oxford)*  
639 2020; **2020**.
- 640 46. Edgar RC. MUSCLE: multiple sequence alignment with high accuracy and high throughput.  
641 *Nucleic Acids Res* 2004; **32**: 1792–1797.
- 642 47. Oksanen J, Blanchet FG, Friendly M, Kindt R, Legendre P, McGlinn D, et al. vegan:  
643 Community Ecology Package. 2019.
- 644 48. Paradis E, Schliep K. ape 5.0: an environment for modern phylogenetics and evolutionary  
645 analyses in R. *Bioinformatics* 2019; **35**: 526–528.
- 646 49. Bates D, Mächler M, Bolker B, Walker S. Fitting Linear Mixed-Effects Models Using lme4.  
647 *Journal of Statistical Software* 2015; **67**: 1–48.
- 648 50. Lenth RV. Least-Squares Means: The R Package lsmeans. *Journal of Statistical Software*  
649 2016; **69**: 1–33.
- 650 51. Wickham H. ggplot2: Elegant Graphics for Data Analysis. 2016. Springer-Verlag New York.
- 651 52. Legendre P, Desdevises Y, Bazin E. A Statistical Test for Host–Parasite Coevolution.  
652 *Systematic Biology* 2002; **51**: 217–234.

- 653 53. Abdullaeva Y, Ambika Manirajan B, Honermeier B, Schnell S, Cardinale M. Domestication  
654 affects the composition, diversity, and co-occurrence of the cereal seed microbiota.  
655 *Journal of Advanced Research* 2020.
- 656 54. Laforest-Lapointe I, Messier C, Kembel SW. Tree Leaf Bacterial Community Structure and  
657 Diversity Differ along a Gradient of Urban Intensity. *mSystems* 2017; **2**.
- 658 55. Kim M, Singh D, Lai-Hoe A, Go R, Abdul Rahim R, A.N. A, et al. Distinctive Phyllosphere  
659 Bacterial Communities in Tropical Trees. *Microb Ecol* 2012; **63**: 674–681.
- 660 56. Grady KL, Sorensen JW, Stopnisek N, Guittar J, Shade A. Assembly and seasonality of core  
661 phyllosphere microbiota on perennial biofuel crops. *Nat Commun* 2019; **10**: 4135.
- 662 57. Galbally IE, Kirstine W. The Production of Methanol by Flowering Plants and the Global  
663 Cycle of Methanol. *Journal of Atmospheric Chemistry* 2002; **43**: 195–229.
- 664 58. Asaf S, Khan AL, Khan MA, Imran QM, Yun B-W, Lee I-J. Osmoprotective functions  
665 conferred to soybean plants via inoculation with *Sphingomonas* sp. LK11 and exogenous  
666 trehalose. *Microbiological Research* 2017; **205**: 135–145.
- 667 59. Madhaiyan M, Alex THH, Ngoh ST, Prithiviraj B, Ji L. Leaf-residing *Methylobacterium*  
668 species fix nitrogen and promote biomass and seed production in *Jatropha curcas*.  
669 *Biotechnol Biofuels* 2015; **8**.
- 670 60. Maignien L, DeForce EA, Chafee ME, Eren AM, Simmons SL. Ecological Succession and  
671 Stochastic Variation in the Assembly of *Arabidopsis thaliana* Phyllosphere Communities.  
672 *mBio* 2014; **5**.
- 673 61. Ottesen AR, Gorham S, Reed E, Newell MJ, Ramachandran P, Canida T, et al. Using a  
674 Control to Better Understand Phyllosphere Microbiota. *PLOS ONE* 2016; **11**: e0163482.

- 675 62. Brucker RM, Bordenstein SR. The roles of host evolutionary relationships (genus: *Nasonia*)  
676 and development in structuring microbial communities. *Evolution* 2012; **66**: 349–362.
- 677 63. Groussin M, Mazel F, Alm EJ. Co-evolution and Co-speciation of Host-Gut Bacteria Systems.  
678 *Cell Host & Microbe* 2020; **28**: 12–22.
- 679 64. Mazel F, Davis KM, Loudon A, Kwong WK, Groussin M, Parfrey LW. Is Host Filtering the  
680 Main Driver of Phylosymbiosis across the Tree of Life? *mSystems* 2018; **3**.
- 681 65. Cyriac D, Hofmann RW, Stewart A, Sathish P, Winefield CS, Moot DJ. Intraspecific  
682 differences in long-term drought tolerance in perennial ryegrass. *PLoS One* 2018; **13**.
- 683 66. Volaire F, Lelièvre F. Drought survival in *Dactylis glomerata* and *Festuca arundinacea* under  
684 similar rooting conditions in tubes. *Plant and Soil* 2001; **229**: 225–234.
- 685 67. Volaire F, Thomas H, Lelièvre F. Survival and recovery of perennial forage grasses under  
686 prolonged Mediterranean drought: I. Growth, death, water relations and solute content in  
687 herbage and stubble. *New Phytologist* 1998; **140**: 439–449.
- 688 68. Taylor SH, Franks PJ, Hulme SP, Spriggs E, Christin PA, Edwards EJ, et al. Photosynthetic  
689 pathway and ecological adaptation explain stomatal trait diversity amongst grasses. *New*  
690 *Phytologist* 2012; **193**: 387–396.
- 691 69. Cardoso JA, Pineda M, Jiménez J de la C, Vergara MF, Rao IM. Contrasting strategies to  
692 cope with drought conditions by two tropical forage C4 grasses. *AoB Plants* 2015; **7**.
- 693 70. Guenni O, Marin DP, Baruch Z. Responses to drought of five *Brachiaria* species. I. Biomass  
694 production, leaf growth, root distribution, water use and forage quality. *Plant and Soil*  
695 2002.

- 696 71. Guenni O, Baruch Z, Marín D. Responses to drought of five Brachiaria species. II. Water  
697 relations and leaf gas exchange. *Plant and Soil* 2004; **258**: 249–260.
- 698 72. Cordovez V, Schop S, Hordijk K, Dupré de Boulois H, Coppens F, Hanssen I, et al. Priming of  
699 Plant Growth Promotion by Volatiles of Root-Associated Microbacterium spp. *Appl Environ*  
700 *Microbiol* 2018; **84**.
- 701 73. Vílchez JI, Niehaus K, Dowling DN, González-López J, Manzanera M. Protection of Pepper  
702 Plants from Drought by Microbacterium sp. 3J1 by Modulation of the Plant's Glutamine  
703 and  $\alpha$ -ketoglutarate Content: A Comparative Metabolomics Approach. *Front Microbiol*  
704 2018; **9**.
- 705 74. Stanton DE, Batterman SA, Fischer JCV, Hedin LO. Rapid nitrogen fixation by canopy  
706 microbiome in tropical forest determined by both phosphorus and molybdenum. *Ecology*  
707 2019; **100**: e02795.
- 708 75. Baldani JI, Rouws L, Cruz LM, Olivares FL, Schmid M, Hartmann A. The Family  
709 Oxalobacteraceae. In: Rosenberg E, DeLong EF, Lory S, Stackebrandt E, Thompson F (eds).  
710 *The Prokaryotes: Alphaproteobacteria and Betaproteobacteria*. 2014. Springer, Berlin,  
711 Heidelberg, pp 919–974.
- 712
- 713



714 FIGURE LEGENDS

715

716 **Figure 1. Average relative abundance of bacteria from 57 plants (27 control and 30**

717 **drought) sampled at 5 separate time points over 38 days. (A)** The most dominant bacterial

718 classes changed over time, between host species, and as a result of drought. To understand the

719 composition of these classes, the average relative abundance of the genera from the three most

720 abundant classes were plotted. Genera included were present in greater than 0.25% average

721 relative abundance. At the end of 38 days when drought effect was strongest, we observed

722 significant differences as a result of drought in *Actinobacteria* ( $P < 0.001$ ), *Bacilli* ( $P = 0.006$ ), and

723 *Cytophagia* ( $P = 0.001$ ) (calculated using TukeyHSD). Additionally, strong differences were

724 observed between host species with significant differences observed in *Actinobacteria*

725 ( $P < 0.001$ ), *Alphaproteobacteria* ( $P < 0.001$ ), *Bacilli* ( $P < 0.001$ ), *Betaproteobacteria* ( $P < 0.001$ ),

726 *Cytophagia* ( $P < 0.001$ ), *Deltaproteobacteria* ( $P = 0.001$ ), and *Gammaproteobacteria* ( $P = 0.008$ )

727 (B) The class Alphaproteobacteria was dominated by the genera *Sphingomonas* and

728 *Methylobacterium*, (C) Gammaproteobacteria was not consistently dominated by any individual

729 genera, and (D) the class Cytophagia was dominated by the genus *Hymenobacter*.

730

731

732 **Figure 2. Bacterial communities from each host species became more distinct over time and**

733 **were significantly impacted by drought stress.** NMDS ordination was plotted for each

734 sampling day using weighted UniFrac distances. PERMANOVA was conducted for each

735 corresponding day to determine how communities were changing over time and when drought

736 stress altered community structure.

737

738 **Figure 3. Phyllosphere communities became more similar over time regardless of treatment**

739 **on the temperate host species but stayed the same on the tropical host species.** Average

740 distance between samples from the same host species were calculated for each sampling day

741 using weighted UniFrac distance. Average distance within each host species significantly

742 decreased in the communities from temperate hosts but did not change in the communities from

743 the tropical hosts.

744

745

746 **Figure 4. The top eight ASVs important for predicting if samples were from control or**

747 **drought stressed plant hosts.** Average relative abundance of each of the eight ASVs is given

748 for control (n=27) and drought stressed plants (n=30) on day 38 of the experiment. ASV

749 identities provided in Supplementary Table S1.

750

751 **Figure 5. Cophylogenetic relationship analysis was conducted for (A) control plants (n=27)**

752 **and (B) drought stressed plants (n=30).** Blue lines in this tanglegram represent significant

753 associations between phyllosphere bacteria on the left and their plant hosts on the right measured

754 using ParaFitGlobal, which were determined if either of the ParaFit F statistics were below 0.05.

755 Numbers under host species identity indicate the number of significant associations that a host

756 species has with the bacterial phylogenetic tree. The bacterial phylogenetic tree was constructed

757 in QIIME2 using FastTree which infers approximately-maximum-likelihood phylogenetic trees.

758 The maximum-likelihood tree for the grass host phylogeny was constructed in MEGA. Only five

759 grass species were included because host sequence information was not available for the  
760 *Brachiaria* hybrid.

761

762

763 **Figure 6. Abundance of the *nifH* gene was significantly different between host species and**  
764 **changed over time.** However, it was not significantly impacted by drought stress. *nifH*  
765 abundance was measured using qPCR and standardized to number of copies per gram of leaf  
766 material.

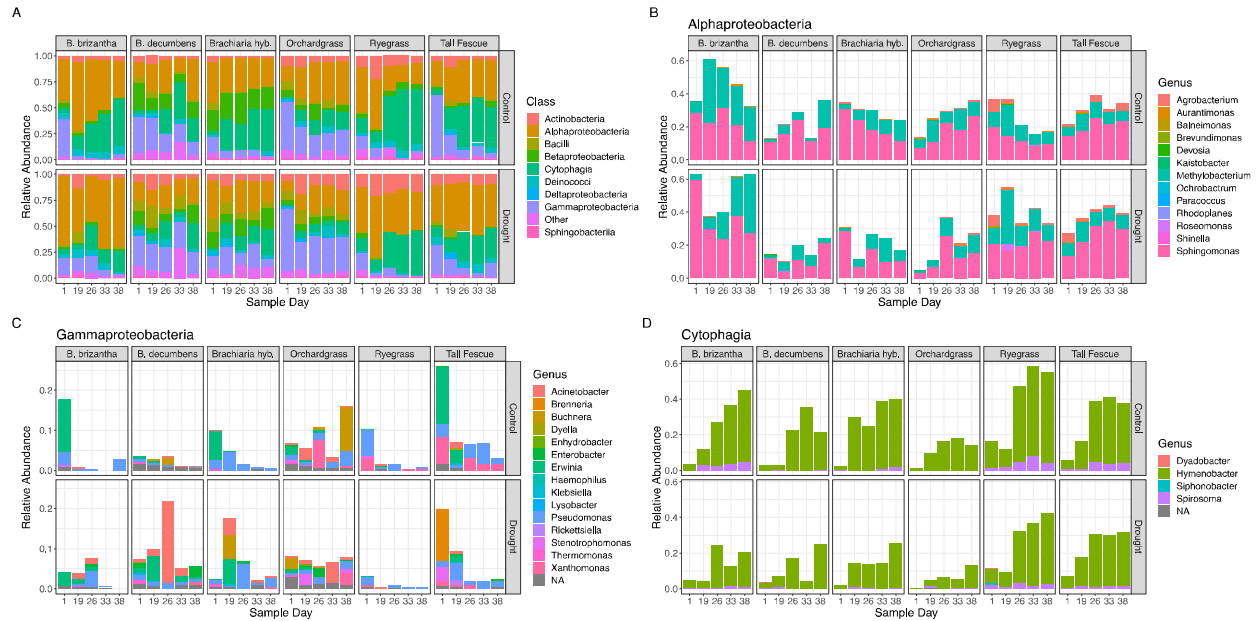

**Figure 1. Average relative abundance of bacteria from 57 plants (27 control and 30 drought) sampled at 5 separate time points over 38 days.** (A) The most dominant bacterial classes changed over time, between host species, and as a result of drought. To understand the composition of these classes, the average relative abundance of the genera from the three most abundant classes were plotted. Genera included were present in greater than 0.25% average relative abundance. At the end of 38 days when drought effect was strongest, we observed significant differences as a result of drought in *Actinobacteria* ( $P < 0.001$ ), *Bacilli* ( $P = 0.006$ ), and *Cytophagia* ( $P = 0.001$ ) (calculated using TukeyHSD). Additionally, strong differences were observed between host species with significant differences observed in *Actinobacteria* ( $P < 0.001$ ), *Alphaproteobacteria* ( $P < 0.001$ ), *Bacilli* ( $P < 0.001$ ), *Betaproteobacteria* ( $P < 0.001$ ), *Cytophagia* ( $P < 0.001$ ), *Deltaproteobacteria* ( $P = 0.001$ ), and *Gammaproteobacteria* ( $P = 0.008$ ) (B) The class Alphaproteobacteria was dominated by the genera *Shingomonas* and *Methylobacterium*, (C) Gammaproteobacteria was not consistently dominated by any individual genera, and (D) the class Cytophagia was dominated by the genus *Hymenobacter*.

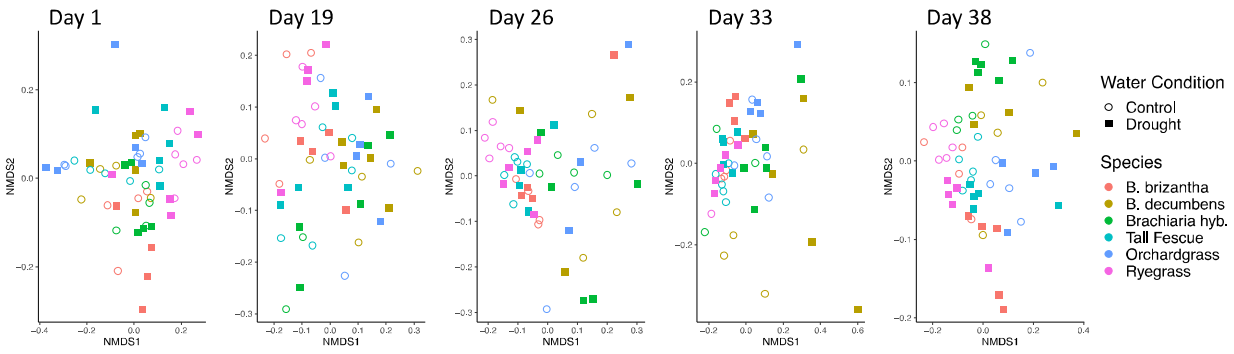

| Weighted Unifrac              |                |          |                |          |                |          |                |          |                |          |
|-------------------------------|----------------|----------|----------------|----------|----------------|----------|----------------|----------|----------------|----------|
|                               | Day 1          |          | Day 19         |          | Day 26         |          | Day 33         |          | Day 38         |          |
|                               | R <sup>2</sup> | P-value  | R <sup>2</sup> | P-value  | R <sup>2</sup> | P-value  | R <sup>2</sup> | P-value  | R <sup>2</sup> | P-value  |
| <b>Treatment</b>              | 0.016          | 0.269    | 0.022          | 0.142    | 0.029          | 0.067    | 0.063          | 0.003**  | 0.047          | 0.003**  |
| <b>Species</b>                | 0.346          | 0.001*** | 0.282          | 0.001*** | 0.312          | 0.001*** | 0.381          | 0.001*** | 0.390          | 0.001*** |
| <b>Species*<br/>Treatment</b> | 0.069          | 0.377    | 0.109          | 0.056    | 0.067          | 0.586    | 0.074          | 0.267    | 0.106          | 0.005**  |

**Figure 2. Bacterial communities from each host species became more distinct over time and were significantly impacted by drought stress.** NMDS ordination was plotted for each sampling day using weighted UniFrac distances. PERMANOVA was conducted for each corresponding day to determine how communities were changing over time and when drought stress altered community structure.

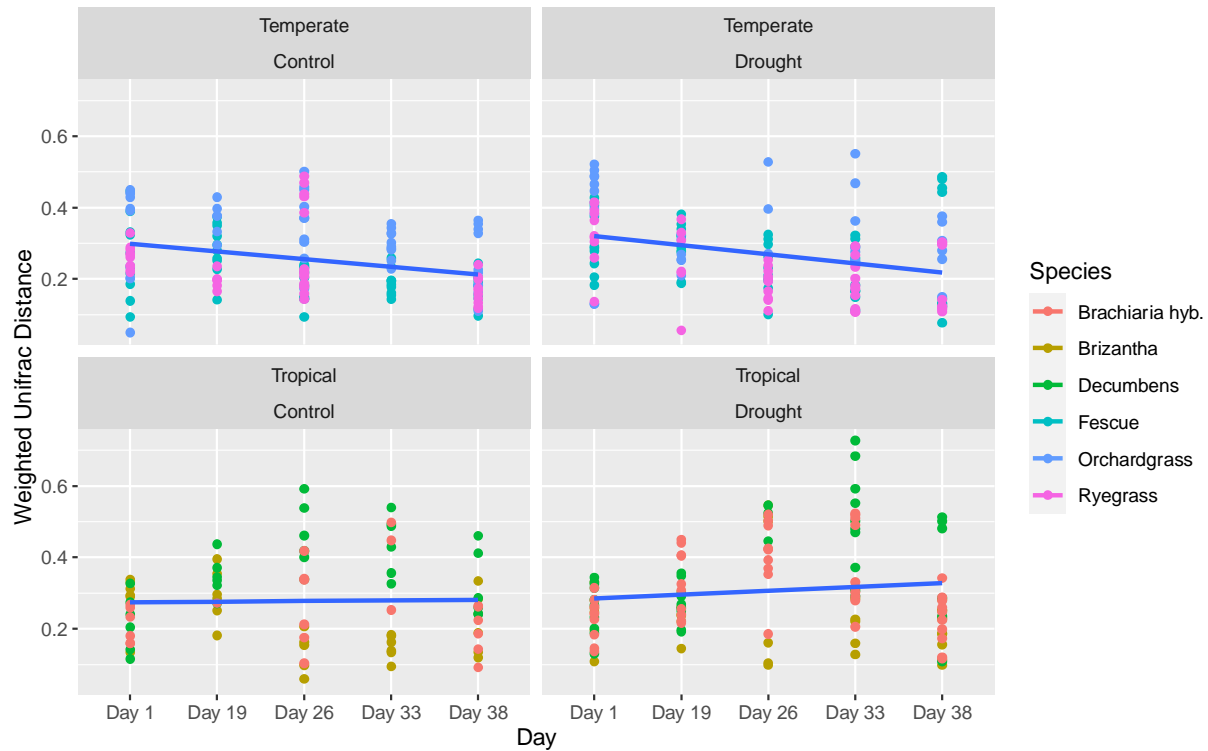

**Figure 3. Phyllosphere communities became more similar over time regardless of treatment on the temperate host species but stayed the same on the tropical host species.** Average distance between samples from the same host species were calculated for each sampling day using weighted UniFrac distance. Average distance within each host species significantly decreased in the communities from temperate hosts but did not change in the communities from the tropical hosts.

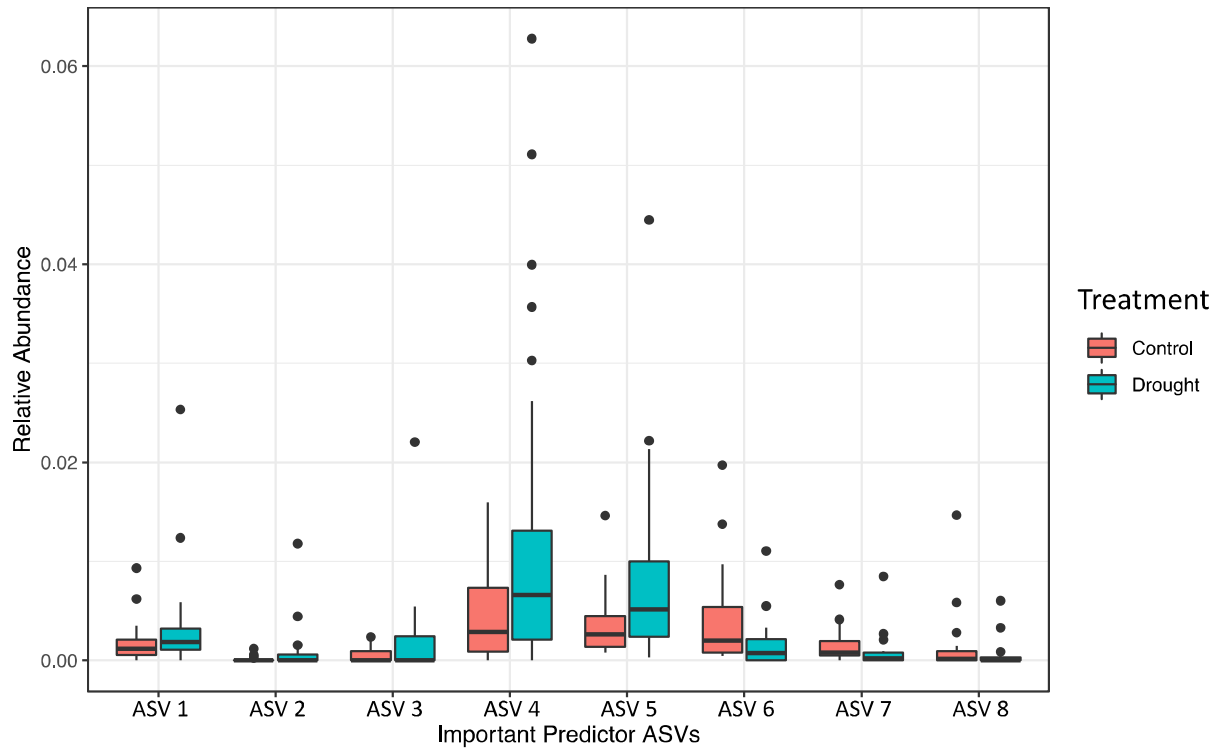

**Figure 4. The top eight ASVs important for predicting if samples were from control or drought stressed plant hosts.** Average relative abundance of each of the eight ASVs is given for control (n=27) and drought stressed plants (n=30) on day 38 of the experiment. ASV identities provided in Supplementary Table S1.

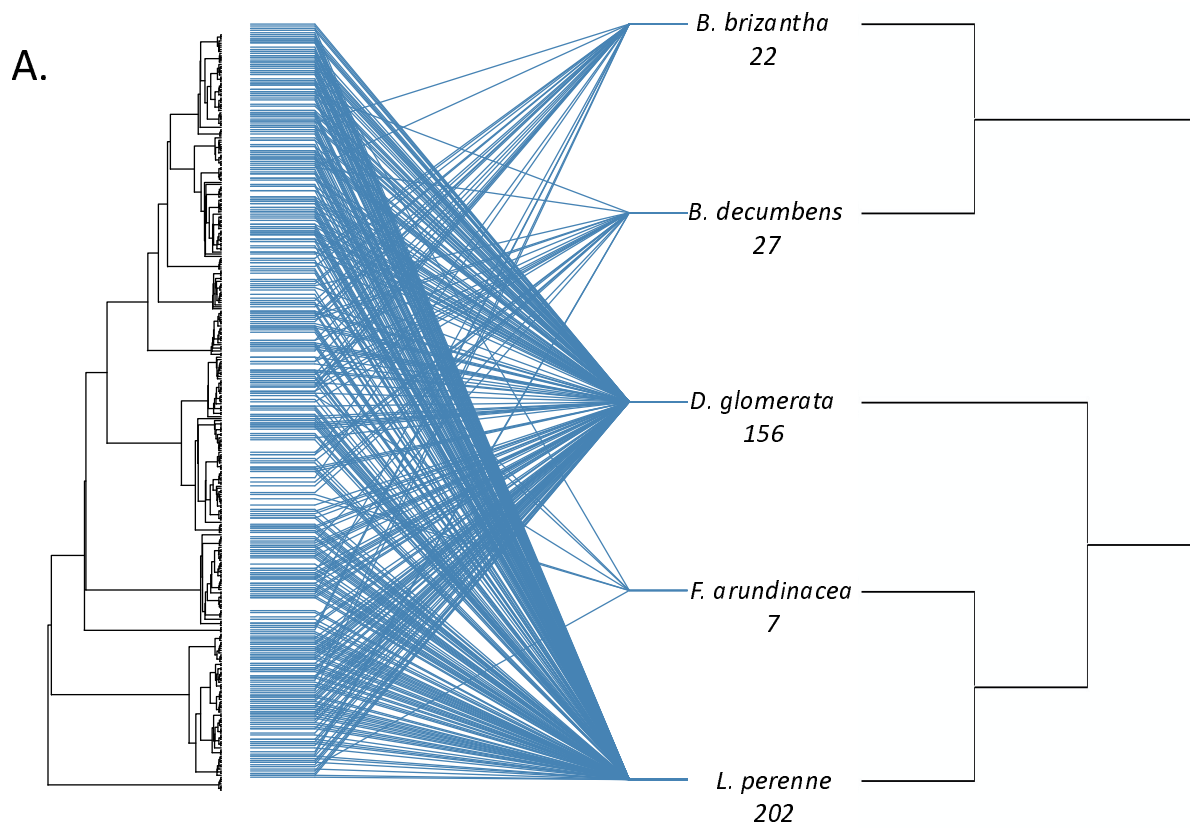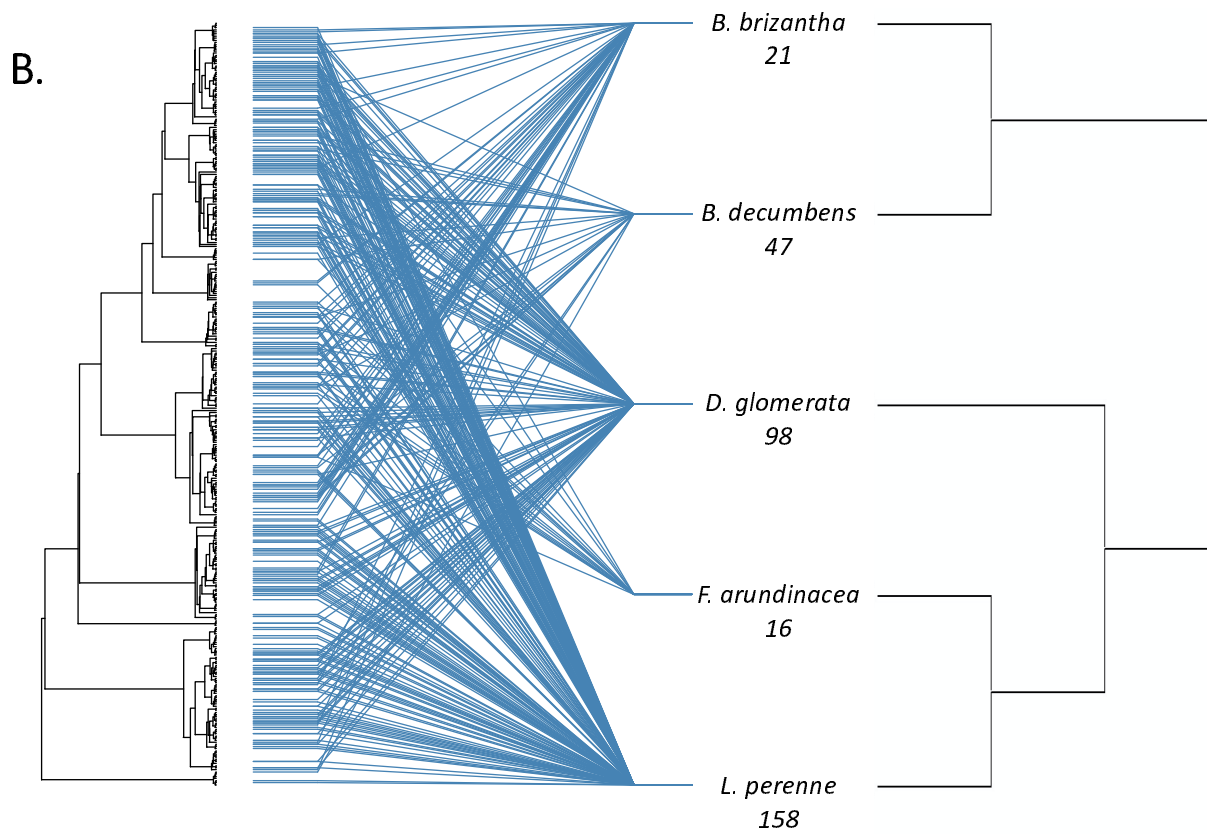



**Figure 5. Cophylogenetic relationship analysis was conducted for (A) control plants (n=27) and (B) drought stressed plants (n=30).** Blue lines in this tanglegram represent significant associations between phyllosphere bacteria on the left and their plant hosts on the right measured using ParaFitGlobal, which were determined if either of the ParaFit F statistics were below 0.05. Numbers under host species identity indicate the number of significant associations that a host species has with the bacterial phylogenetic tree. The bacterial phylogenetic tree was constructed in QIIME2 using FastTree which infers approximately-maximum-likelihood phylogenetic trees. The maximum-likelihood tree for the grass host phylogeny was constructed in MEGA. Only five grass species were included because host sequence information was not available for the *Brachiaria* hybrid.

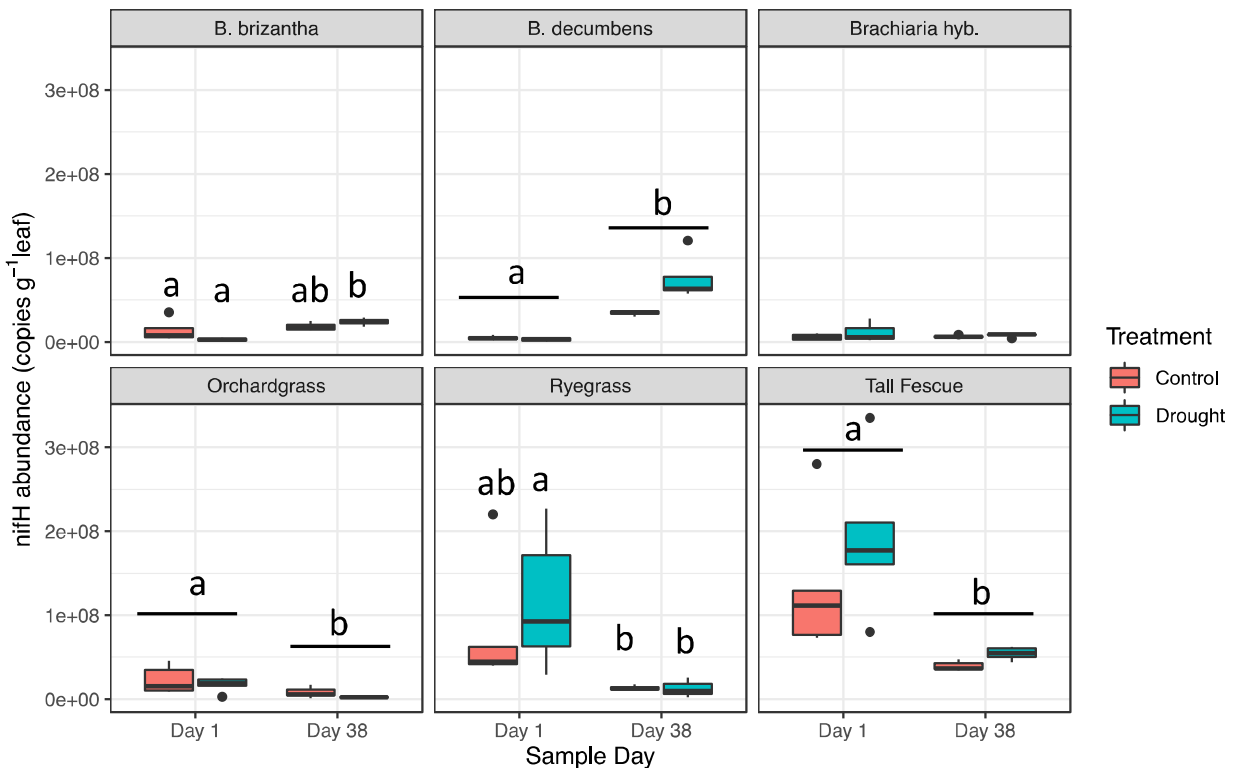

**Figure 6. Abundance of the *nifH* gene was significantly different between host species and changed over time.** However, it was not significantly impacted by drought stress. *nifH* abundance was measured using qPCR and standardized to number of copies per gram of leaf material.

**Table 1. Phyllosphere community structure on native temperate and non-native tropical grasses change over time (day) and are impacted by host species and drought treatment.** Impact of each variable on community structure was determined using a PERMANOVA on weighted UniFrac distance measures.

| Variable              | Weighted UniFrac Distance |          |
|-----------------------|---------------------------|----------|
|                       | R <sup>2</sup>            | P-value  |
| Treatment             | 0.019                     | 0.001*** |
| Day                   | 0.142                     | 0.001*** |
| Species               | 0.191                     | 0.001*** |
| Treatment*Day         | 0.017                     | 0.008**  |
| Treatment*Species     | 0.029                     | 0.001*** |
| Day*Species           | 0.101                     | 0.001*** |
| Treatment*Day*Species | 0.043                     | 0.0572   |

**Table 2. The effect of host species on phyllosphere community composition on non-stressed hosts increased over time.** The impact of host species on community structure was measured for communities from the well-watered control host plants at (A) the beginning (day 1) and (B) the end (day 38) of the drought period. Influence of host species was determined for all hosts together and separately for the native temperate grasses and non-native tropical grasses using a PERMANOVA of weighted UniFrac distances.

A.

| DAY 1     | All host plants |         | Temperate      |         | Tropical       |         |
|-----------|-----------------|---------|----------------|---------|----------------|---------|
|           | R <sup>2</sup>  | P-value | R <sup>2</sup> | P-value | R <sup>2</sup> | P-value |
| Species   | 0.38            | 0.01    | 0.34           | 0.039   | 0.31           | 0.094   |
| Residuals | 0.62            |         | 0.65           |         | 0.69           |         |

B.

| DAY 38    | All host plants |         | Temperate      |         | Tropical       |         |
|-----------|-----------------|---------|----------------|---------|----------------|---------|
|           | R <sup>2</sup>  | P-value | R <sup>2</sup> | P-value | R <sup>2</sup> | P-value |
| Species   | 0.57            | 0.001   | 0.72           | 0.001   | 0.39           | 0.024   |
| Residuals | 0.43            |         | 0.28           |         | 0.61           |         |
